# Supplementary material for: One-Step Construction of Tryptophan-Derived Small Molecule Hydrogels for Antibacterial Materials
Source: MDPI journal article supplement (doi:10.3390/molecules28083334), 2023-04-10
Supplement: s1 [file s1]

*Supplementary Materials*

# One-Step Construction of Tryptophan-Derived Small Molecule Hydrogels for Antibacterial Materials

Xianwen Song <sup>†</sup>, Shunmei He <sup>†</sup>, Jun Zheng, Shutong Yang, Qiang Li and Yi Zhang <sup>\*</sup>

Hunan Provincial Key Laboratory of Micro & Nano Materials Interface Science, College of Chemistry and Chemical Engineering, Central South University, Changsha 410083, China;  
songxianwen.sxw@foxmail.com (X.S.); h1757234106e@163.com (S.H.); zhengjun@csu.edu.cn (J.Z.);  
yangst@csu.edu.cn (S.Y.); liqiang0410@outlook.com (Q.L.)

<sup>\*</sup> Correspondence: yzhangcsu@csu.edu.cn

<sup>†</sup> These authors contributed equally to this work.

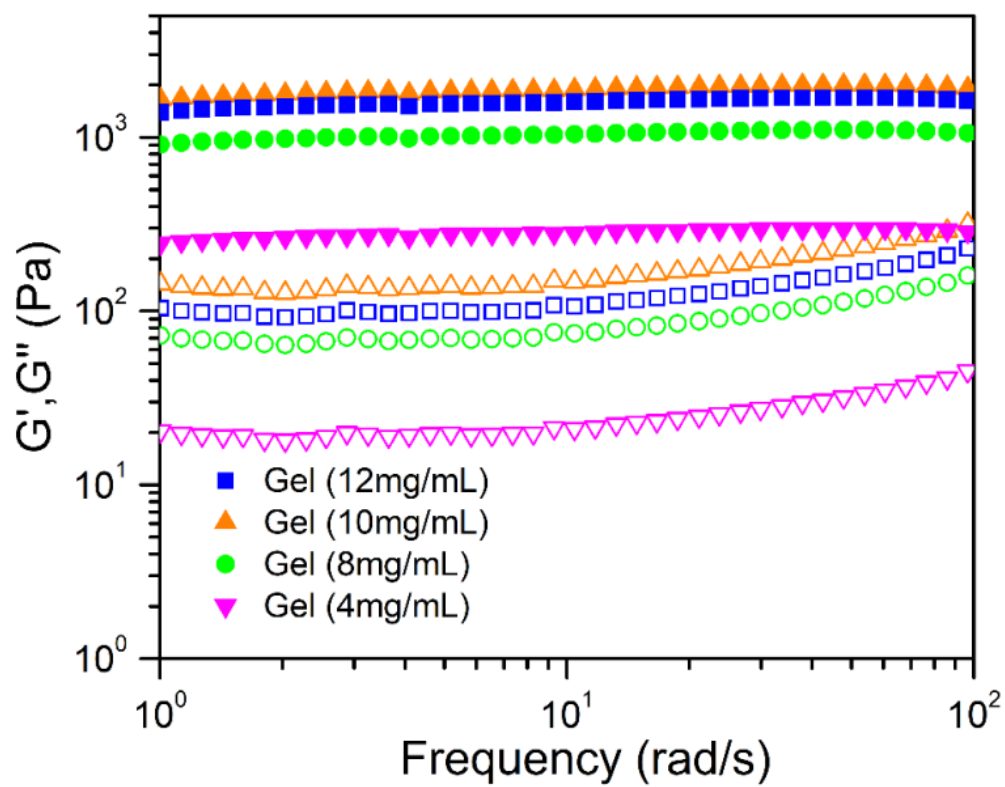

**Figure S1.** Frequency sweep of the ZW/GDL hydrogels with different concentrations.

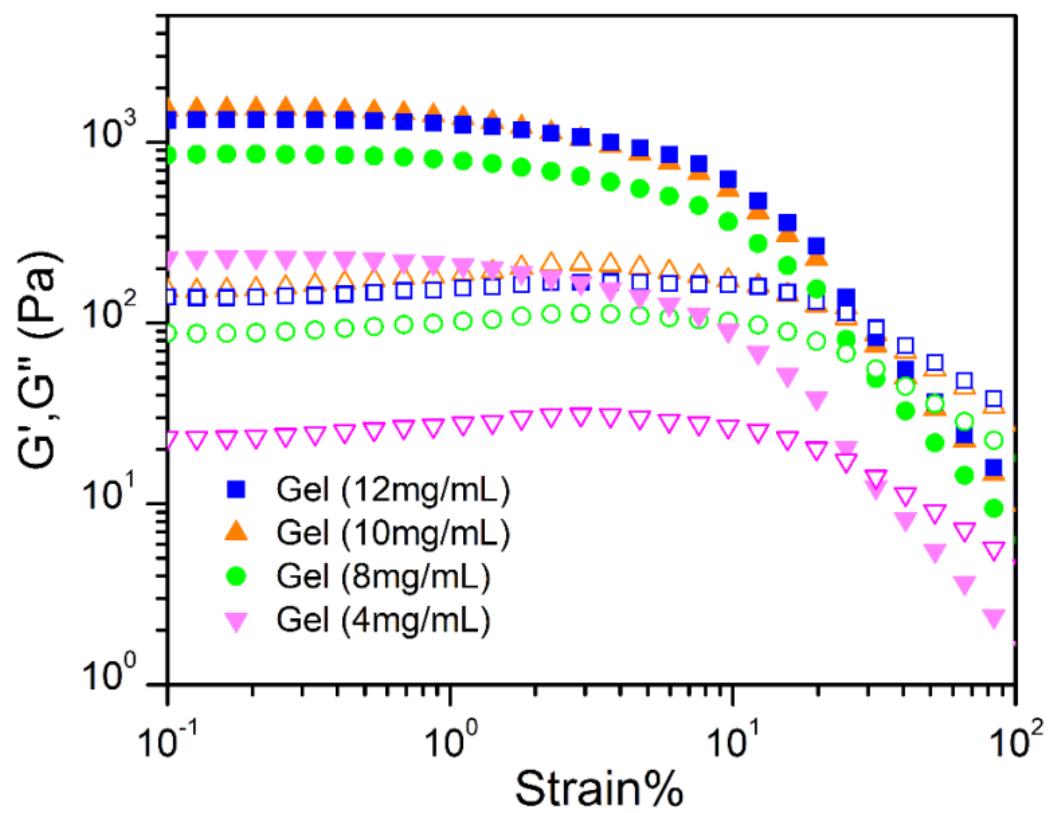

**Figure S2.** Dynamic oscillatory stress sweep of the ZW/GDL hydrogels with different concentrations.

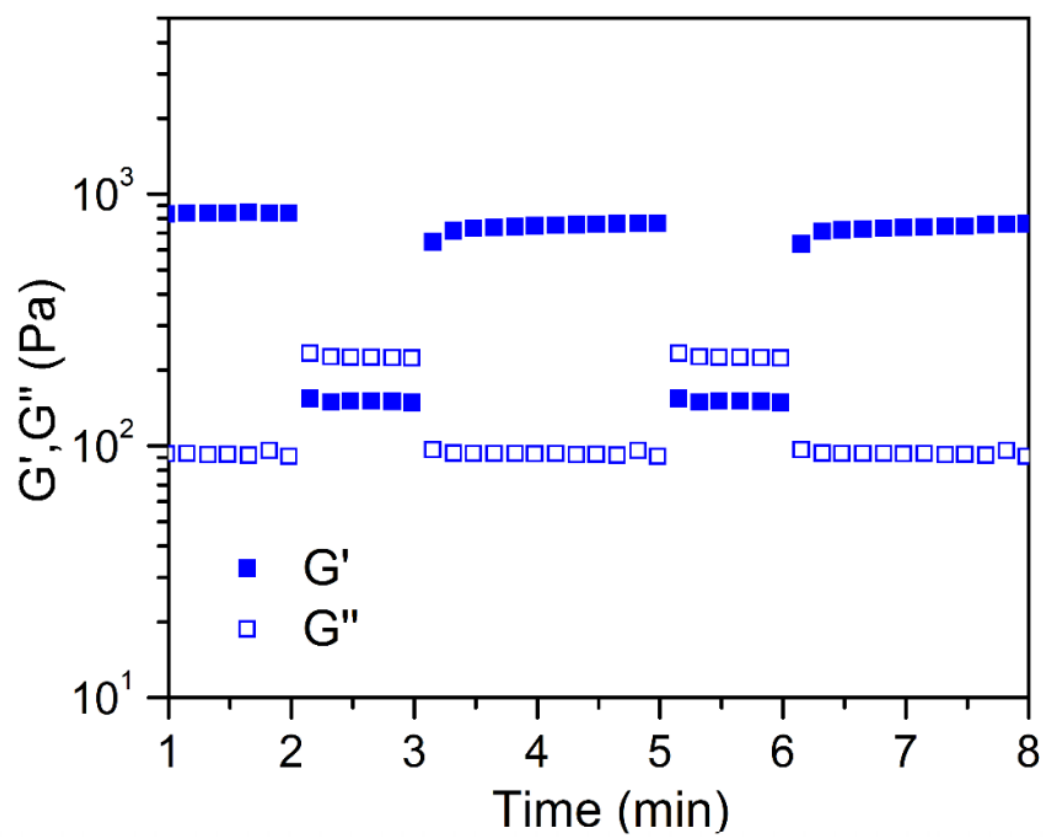

**Figure S3.** Alternate Step-strain sweep measurements of the ZW/GDL hydrogels at 6 mg/mL.

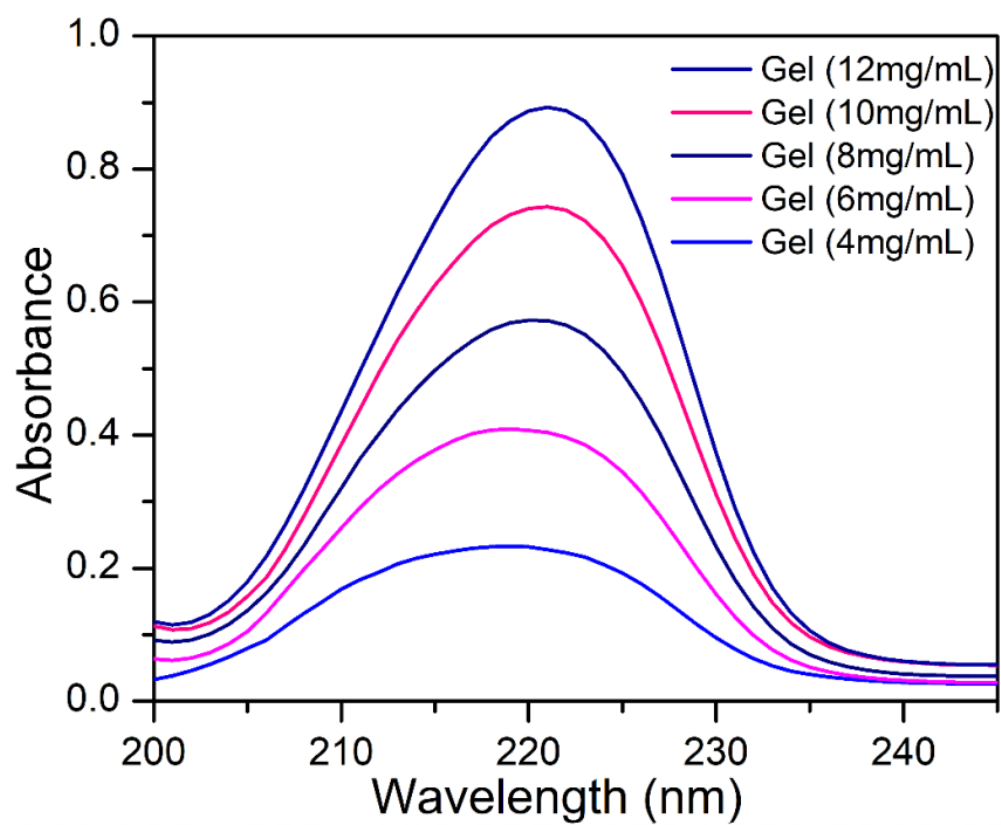

**Figure S4.** UV-Vis spectra of the ZW/GDL hydrogels with different concentrations.

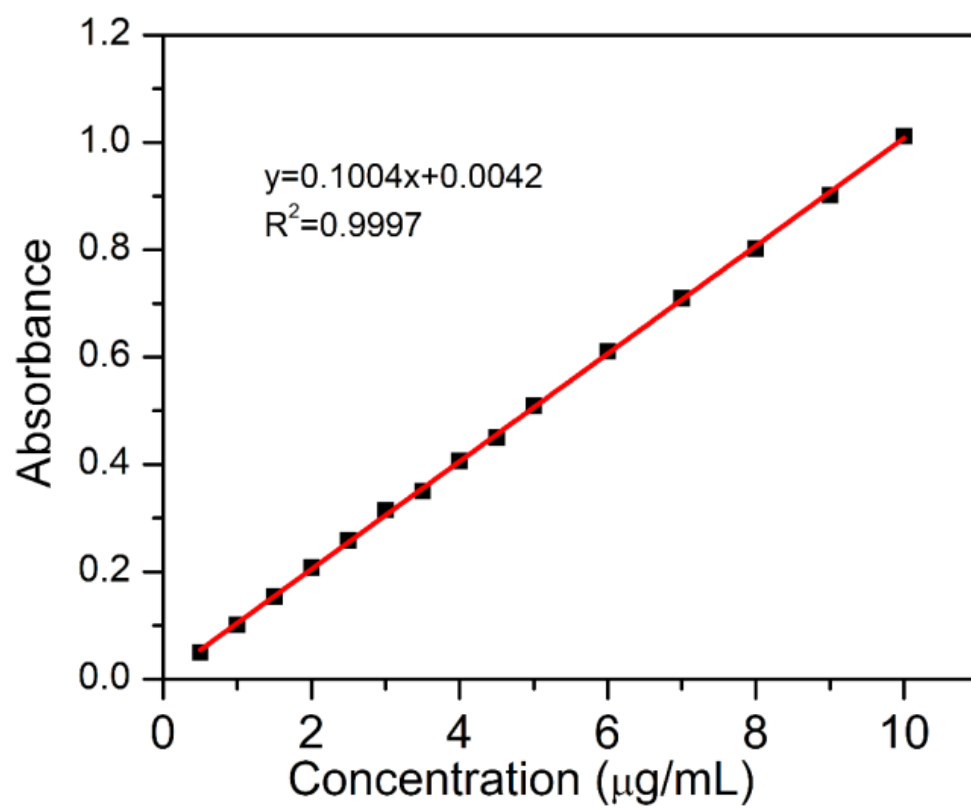

**Figure S5.** The standard curve of ZW/GDL hydrogel incubated with PBS solution (pH 7.4) at 37 °C.

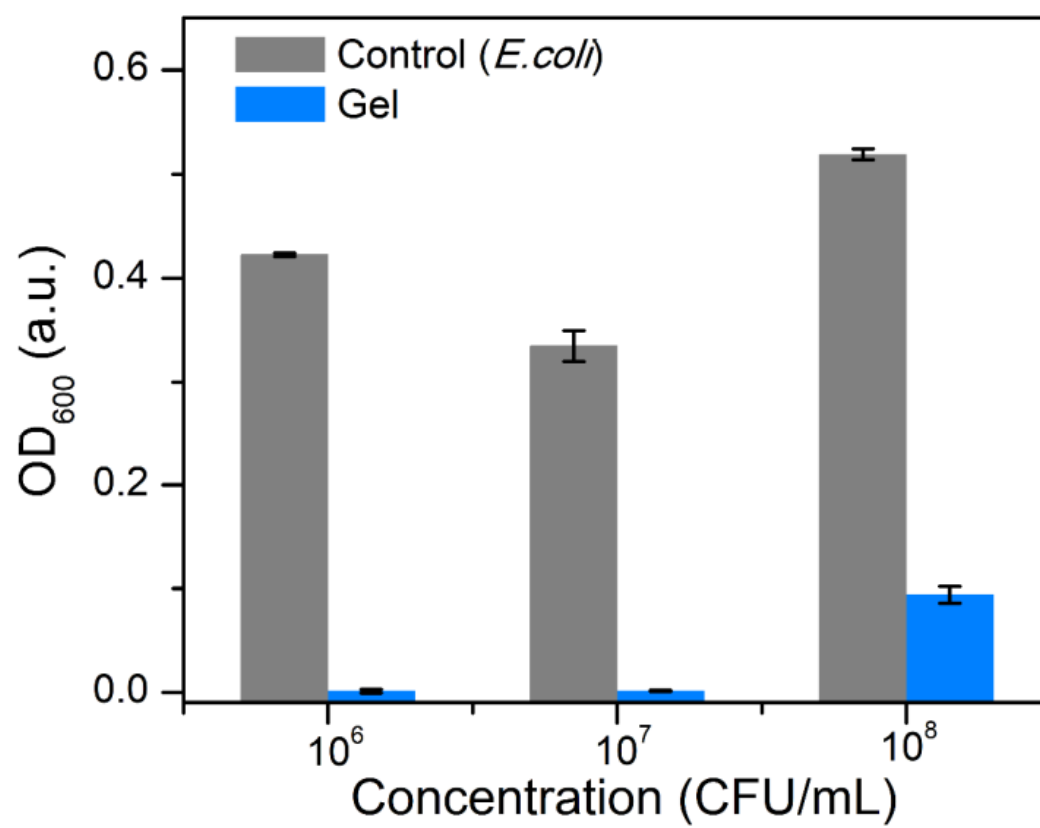

**Figure S6.** Concentration-dependent antimicrobial effect of the ZW/GDL hydrogel toward *E.coli* bacteria.

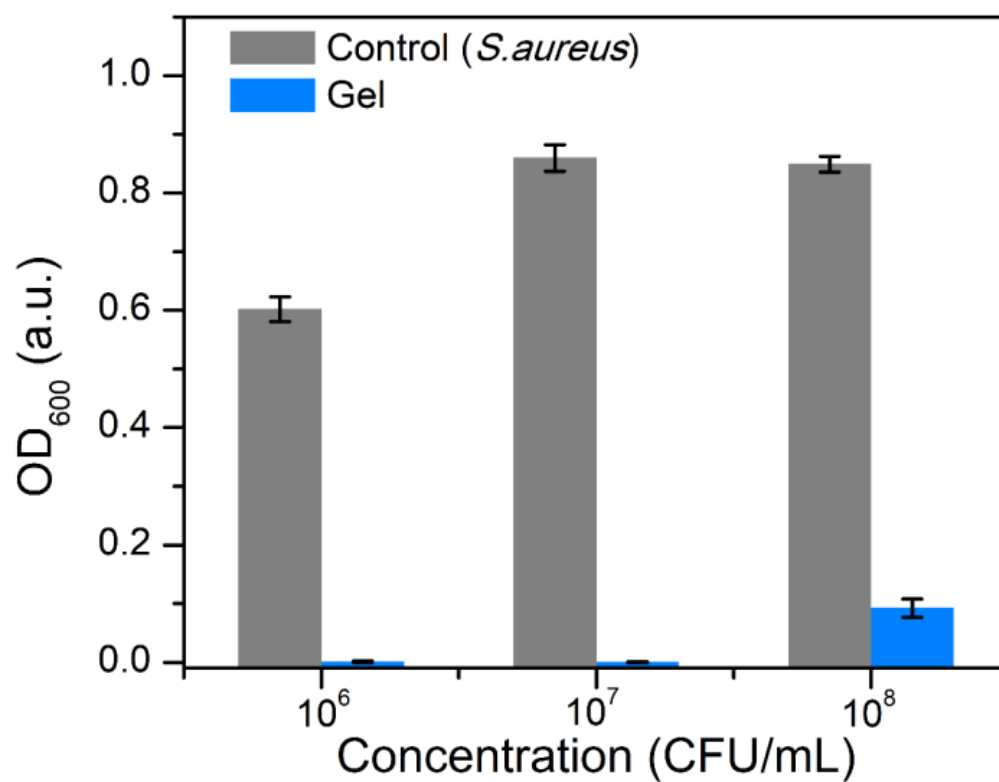

**Figure S7.** Concentration-dependent antimicrobial effect of the ZW/GDL hydrogel toward *S. aureus* bacteria.
